# Supplementary material for: Phylogeny and Taxonomic Revision of the Genus Melanosciadium (Apiaceae), Based on Plastid Genomes and Morphological Evidence
Source: MDPI journal article supplement (doi:10.3390/plants13060907), 2024-03-21
Supplement: s1 [file s1]

Table S1. Sources of fruits of these species.

| Species                               | Locality                                 | Voucher       |
|---------------------------------------|------------------------------------------|---------------|
| <i>Melanosciadium pimpinelloideum</i> | Nanchuan District, Chongqing City, China | JQP20091502   |
| <i>Melanosciadium jinzhaiensis</i>    | Jinzhai County, Anhui Province, China    | JQP18102302   |
| <i>Melanosciadium bipinnatum</i>      | Wenchuan County, Sichuan Province, China | JQP20092602   |
| <i>Ligusticum angelicifolium</i>      | Dali City, Yunnan Province, China        | JQP19091801   |
| <i>Angelica tsinlingensis</i>         | Huayin City, Shaanxi Province, China     | JQP19101801-1 |
