# Supplementary material for: Phylogeny and Taxonomic Revision of the Genus Melanosciadium (Apiaceae), Based on Plastid Genomes and Morphological Evidence
Source: MDPI journal article supplement (doi:10.3390/plants13060907), 2024-03-21
Supplement: s1 [file s1]

Table S5. List of species in this study with their GenBank accession number for 85 plastid genome sequences obtained from National Center for Biotechnology Information (NCBI).

| Clade name                   | Genus name           | Species name                       | GenBank accession numbers |
|------------------------------|----------------------|------------------------------------|---------------------------|
| Saniculoideae                |                      |                                    |                           |
|                              | <i>Sanicula</i>      | <i>Sanicula rubriflora</i>         | MW690208                  |
|                              |                      | <i>Sanicula orthacantha</i>        | MK293943                  |
|                              |                      | <i>Sanicula lamelligera</i>        | MT561031                  |
|                              |                      | <i>Sanicula chinensis</i>          | MK208987                  |
| Apiioideae                   |                      |                                    |                           |
| <i>Chamaesium</i> Clade      | <i>Chamaesium</i>    | <i>Chamaesium delavayi</i>         | MN119367                  |
|                              |                      | <i>Chamaesium thalictrifolium</i>  | MN119372                  |
|                              |                      | <i>Chamaesium spatuliferum</i>     | MN119371                  |
|                              |                      | <i>Chamaesium jiulongense</i>      | MN119368                  |
| Bupleureae                   | <i>Bupleurum</i>     | <i>Bupleurum smithii</i>           | MN854382                  |
|                              |                      | <i>Bupleurum chinense</i>          | MN337347                  |
|                              |                      | <i>Bupleurum yinchowense</i>       | MT075711                  |
|                              |                      | <i>Bupleurum bicaule</i>           | MT534603                  |
|                              |                      | <i>Bupleurum angustissimum</i>     | MT534602                  |
| Pleurospermeae               | <i>Pleurospermum</i> | <i>Pleurospermum camtschaticum</i> | KU041142                  |
|                              |                      | <i>Pleurospermum decurrens</i>     | OP425133                  |
|                              |                      | <i>Pleurospermum szechenyii</i>    | OP425139                  |
|                              |                      | <i>Pleurospermum franchetianum</i> | MW147498                  |
| <i>Physospermopsis</i> Clade | <i>Tongoloa</i>      | <i>Tongoloa silaifolia</i>         | MN218688                  |
|                              | <i>Hansenia</i>      | <i>Hansenia weberbaueriana</i>     | KX808491                  |
|                              |                      | <i>Hansenia forrestii</i>          | MG197741                  |
|                              |                      | <i>Hansenia forbesii</i>           | KX808492                  |
| <i>Komarovia</i> Clade       | <i>Chuanminshen</i>  | <i>Chuanminshen violaceum</i>      | KU921430                  |
|                              | <i>Changium</i>      | <i>Changium smyrnioides</i>        | MN092718                  |
| Oenantheae                   | <i>Cryptotaenia</i>  | <i>Cryptotaenia japonica</i>       | MK629764                  |
|                              | <i>Cicuta</i>        | <i>Cicuta virosa</i>               | KX352466                  |
|                              | <i>Oenanthe</i>      | <i>Oenanthe javanica</i>           | MK303392                  |
|                              |                      | <i>Oenanthe linearis</i>           | MT561035                  |
|                              | <i>Trachyspermum</i> | <i>Trachyspermum ammi</i>          | MN746303                  |
| Scandicinae                  | <i>Anthriscus</i>    | <i>Anthriscus sylvestris</i>       | MT561042                  |
|                              |                      | <i>Anthriscus cerefolium</i>       | GU456628                  |
|                              | <i>Ferula</i>        | <i>Ferula sinkiangensis</i>        | MW411057                  |
|                              | <i>Daucus</i>        | <i>Daucus carota</i>               | DQ898156                  |
|                              | <i>Cuminum</i>       | <i>Cuminum cyminum</i>             | MN901636                  |
| <i>Acronema</i> Clade        | <i>Meeboldia</i>     | <i>Meeboldia yunnanensis</i>       | MK993275                  |
|                              |                      | <i>Meeboldia delavayi</i>          | MT843765                  |
|                              |                      | <i>Meeboldia microloba</i>         | MT843766                  |
|                              | <i>Pternopetalum</i> | <i>Pternopetalum vulgare</i>       | MT561032                  |
|                              |                      | <i>Pternopetalum davidii</i>       | MW316663                  |

|                  |                      |                                    |          |
|------------------|----------------------|------------------------------------|----------|
|                  | <i>Ostericum</i>     | <i>Ostericum huadongense</i>       | MW436385 |
|                  |                      | <i>Ostericum grosseserratum</i>    | MW436384 |
|                  |                      | <i>Ostericum citriodorum</i>       | MT501096 |
|                  |                      | <i>Ostericum palustre</i>          | MN970215 |
|                  |                      | <i>Ostericum muliense</i>          | OM281949 |
|                  |                      | <i>Ostericum scaberulum</i>        | OM281950 |
|                  |                      | <i>Ostericum maximowiczii</i>      | OM281948 |
| Apiaceae         | <i>Apium</i>         | <i>Apium graveolens</i>            | MK036045 |
|                  | <i>Petroselinum</i>  | <i>Petroselinum crispum</i>        | HM596073 |
|                  | <i>Foeniculum</i>    | <i>Foeniculum vulgare</i>          | KR011054 |
|                  | <i>Anethum</i>       | <i>Anethum graveolens</i>          | KR011055 |
| Hymenidium Clade | <i>Ligusticum</i>    | <i>Ligusticum pteridophyllum</i>   | MT409617 |
|                  |                      | <i>Ligusticum tenuissimum</i>      | KT963039 |
|                  |                      | <i>Ligusticum jeholense</i>        | MT561037 |
|                  |                      | <i>Ligusticum chuanxiong</i>       | KX594382 |
|                  |                      | <i>Ligusticum sinense</i>          | MH260704 |
| Coriandreae      | <i>Coriandrum</i>    | <i>Coriandrum sativum</i>          | KR002656 |
| Pimpinelleae     | <i>Nothosmyrnum</i>  | <i>Nothosmyrnum japonicum</i>      | MT561036 |
| Tordylieae       | <i>Heracleum</i>     | <i>Heracleum yunnanense</i>        | MN365275 |
|                  |                      | <i>Heracleum candicans</i>         | MK522402 |
|                  |                      | <i>Heracleum yungningense</i>      | MN893285 |
|                  |                      | <i>Heracleum moellendorffii</i>    | MK210561 |
|                  | <i>Semenovia</i>     | <i>Semenovia transiliensis</i>     | MK333395 |
|                  |                      | <i>Semenovia thomsonii</i>         | MW371294 |
|                  |                      | <i>Semenovia gyirongensis</i>      | MK757488 |
|                  | <i>Tordyliopsis</i>  | <i>Tordyliopsis brunonis</i>       | MW741883 |
| Selineae         | <i>Ligusticopsis</i> | <i>Ligusticopsis acaulis</i>       | ON359911 |
|                  |                      | <i>Ligusticopsis brachyloba</i>    | MZ491174 |
|                  |                      | <i>Ligusticopsis capillacea</i>    | MT409612 |
|                  |                      | <i>Ligusticopsis hispida</i>       | MT409614 |
|                  |                      | <i>Ligusticopsis involucrata</i>   | MT409615 |
|                  |                      | <i>Ligusticopsis likiangensis</i>  | MT409616 |
|                  |                      | <i>Ligusticopsis miyiensis</i>     | OP850831 |
|                  |                      | <i>Ligusticopsis modesta</i>       | OL547615 |
|                  |                      | <i>Ligusticopsis rechingeriana</i> | MZ491175 |
|                  |                      | <i>Ligusticopsis scapiformis</i>   | MT409618 |
|                  |                      | <i>Ligusticopsis wallichiana</i>   | OL547616 |
|                  | <i>Seseli</i>        | <i>Seseli montanum</i>             | KM035851 |
|                  | <i>Peucedanum</i>    | <i>Peucedanum praeruptorum</i>     | MN016968 |
|                  |                      | <i>Peucedanum japonicum</i>        | KU866530 |
|                  |                      | <i>Peucedanum terebinthaceum</i>   | MT671397 |
|                  |                      | <i>Peucedanum hakuunense</i>       | OL362112 |
|                  |                      | <i>Peucedanum chujaense</i>        | MT233391 |
|                  | <i>Libanotis</i>     | <i>Libanotis buchtormensis</i>     | MZ707534 |

---

|                       |                                                |          |
|-----------------------|------------------------------------------------|----------|
| <i>Saposhnikovia</i>  | <i>Saposhnikovia divaricata</i>                | MN539269 |
| <i>Ledebouriella</i>  | <i>Ledebouriella seseloides</i>                | KT153021 |
| <i>Cnidium</i>        | <i>Cnidium monnieri</i>                        | MT561041 |
| <i>Melanosciadium</i> | <i>Melanosciadium bipinnatum</i>               | MG719855 |
| <i>Angelica</i>       | <i>Angelica apaensis</i>                       | MT921966 |
|                       | <i>Angelica biserrata</i>                      | MT921960 |
|                       | <i>Angelica cartilaginomarginata</i>           | MT561045 |
|                       | <i>Angelica dahurica</i> var. <i>formosana</i> | MT921971 |
|                       | <i>Angelica gigas</i>                          | MH793272 |
|                       | <i>Angelica kangdingensis</i>                  | MT921965 |
|                       | <i>Angelica keiskei</i>                        | MW125613 |
|                       | <i>Angelica laxifoliata</i>                    | MT921969 |
|                       | <i>Angelica morii</i>                          | MT921982 |
|                       | <i>Angelica nitida</i>                         | MF594405 |
|                       | <i>Angelica porphyrocaulis</i>                 | MT921973 |
|                       | <i>Angelica pseudoselinum</i>                  | MT921968 |
|                       | <i>Angelica sylvestris</i>                     | MN275034 |
|                       | <i>Angelica valida</i>                         | MT921963 |

---
